# Supplementary material
Source: PubMed Central journal article supplement (PMC3991245)
Supplement: NIHMS484572-supplement-06.pdf [file NIHMS484572-supplement-06.pdf]

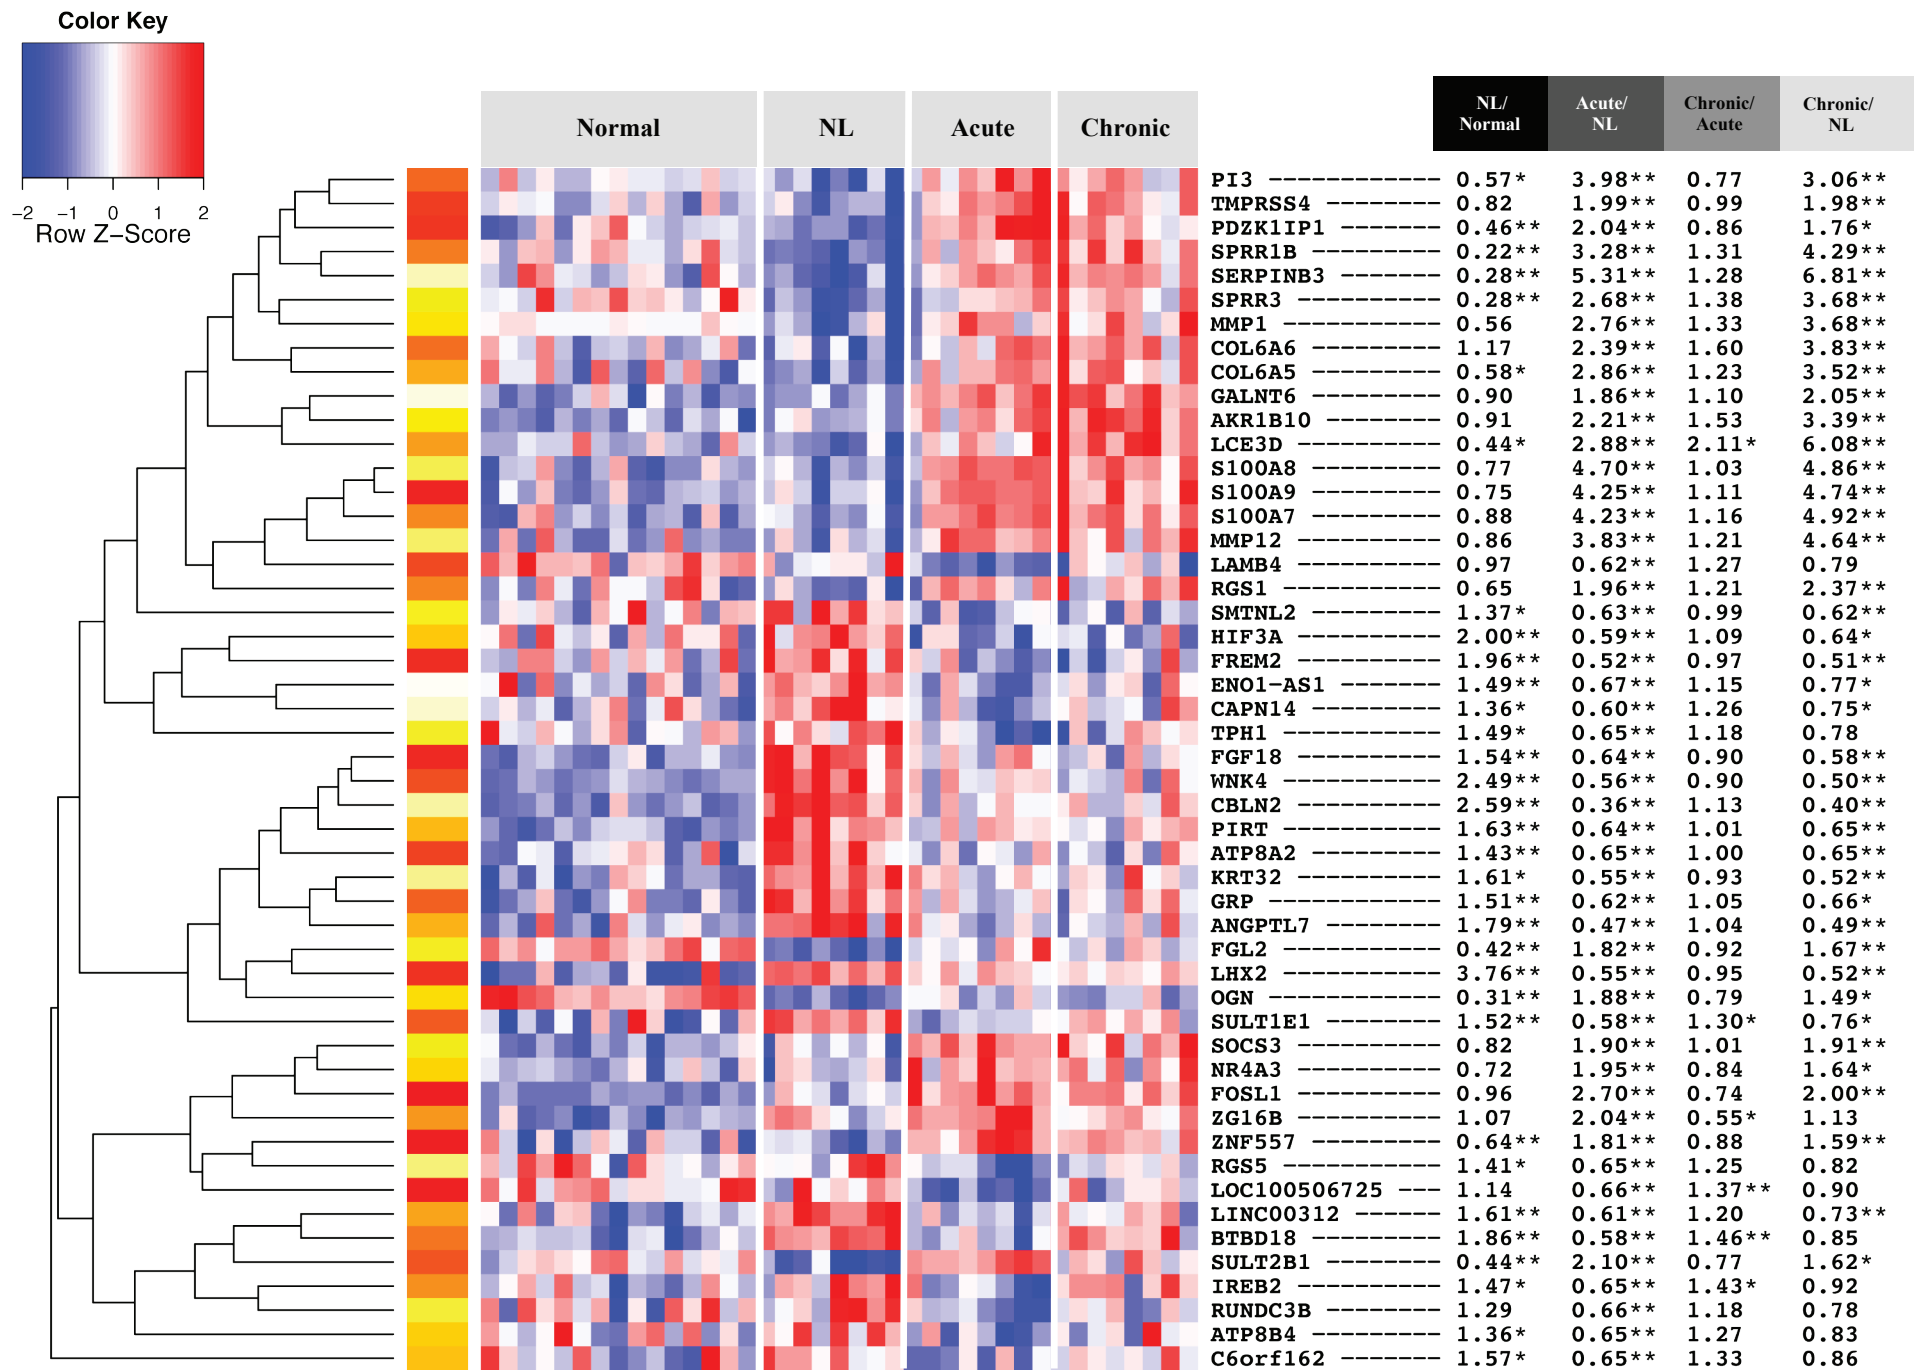

**Figure E1.** The 50 differentially expressed genes (DEGs) between acute and non-lesional atopic dermatitis (AD) include a large representation of terminal differentiation genes. Number of DEGs between acute, compared to non-lesional and chronic lesions, determined using the criteria of fold change (FCH)>1.5 and p-value<0.1. (red, upregulated; blue, downregulated) \*P < .05, \*\*P < .01, and \*\*\*P < .001, (n=8). NL, non-lesional.
