# Supplementary material
Source: PubMed Central journal article supplement (PMC3991245)
Supplement: NIHMS484572-supplement-07.pdf [file NIHMS484572-supplement-07.pdf]

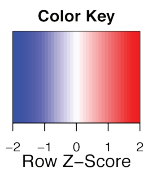

**A** Th2 and IL-4/IL-13 induced genes

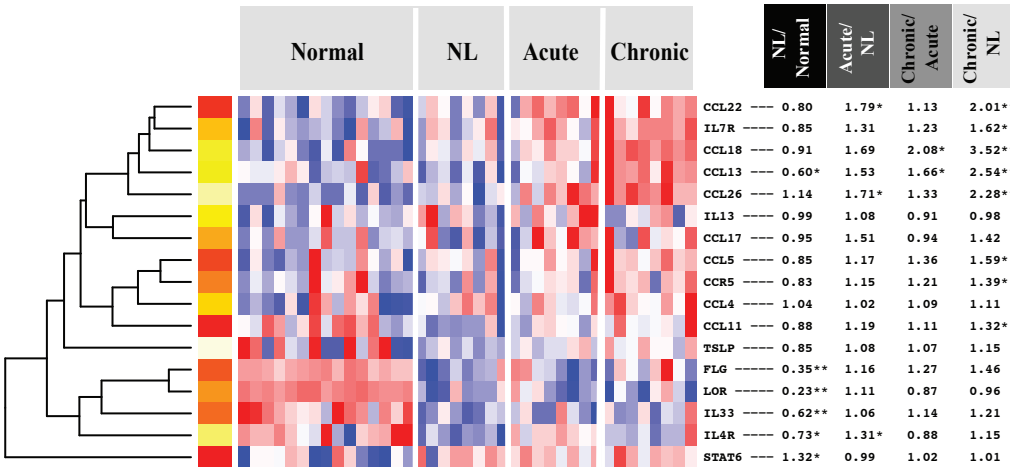

**C** Th1 and IFN- $\gamma$  induced genes

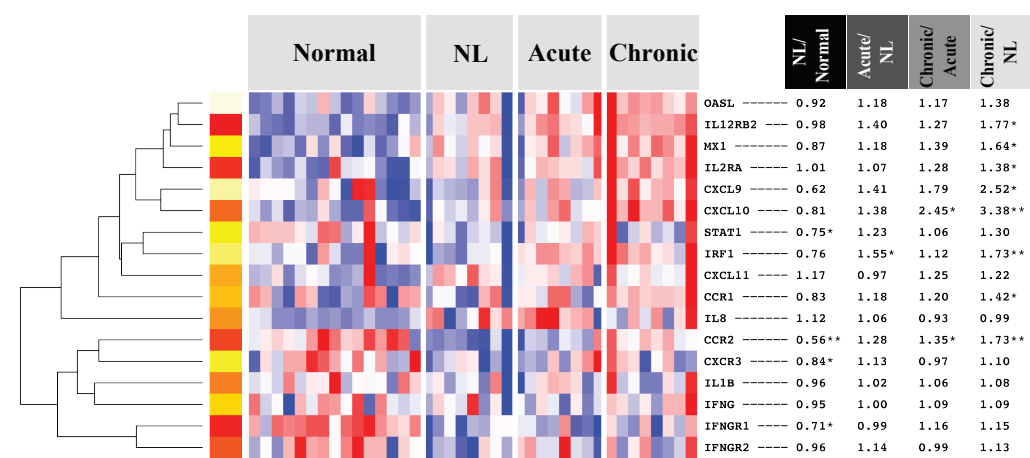

**B** Th22/IL-22 induced genes

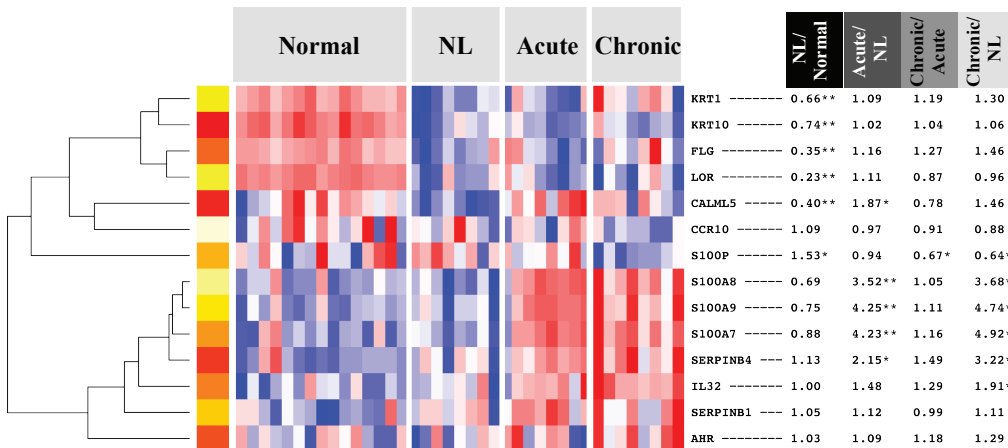

**D** Th17/IL-17 induced genes

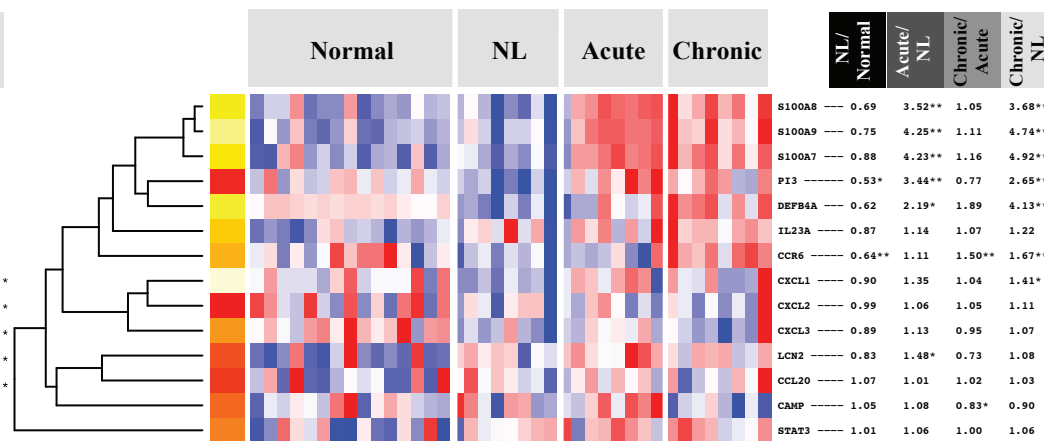

**Figure E2. Progressive activation of representative inflammatory mediators associated with Th1, Th2, Th17 and Th22 T-cell subsets from non-lesional (NL), through acute and chronic atopic dermatitis (AD) skin lesions, by genomic expression. A-D, Representative heatmaps of A, Th2 and IL-4/IL-13, B, Th22/IL-22, C, Th1 and IFN- $\gamma$ , and D, Th17/IL-17 induced genes, respectively. (red, up-regulated; blue, down-regulated). \* $P < .05$ , \*\* $P < .01$ , and \*\*\* $P < .001$ , (n=8 for AD; n=15 for normals).**
