# Supplementary material
Source: PubMed Central journal article supplement (PMC3991245)
Supplement: NIHMS484572-supplement-08.pdf [file NIHMS484572-supplement-08.pdf]

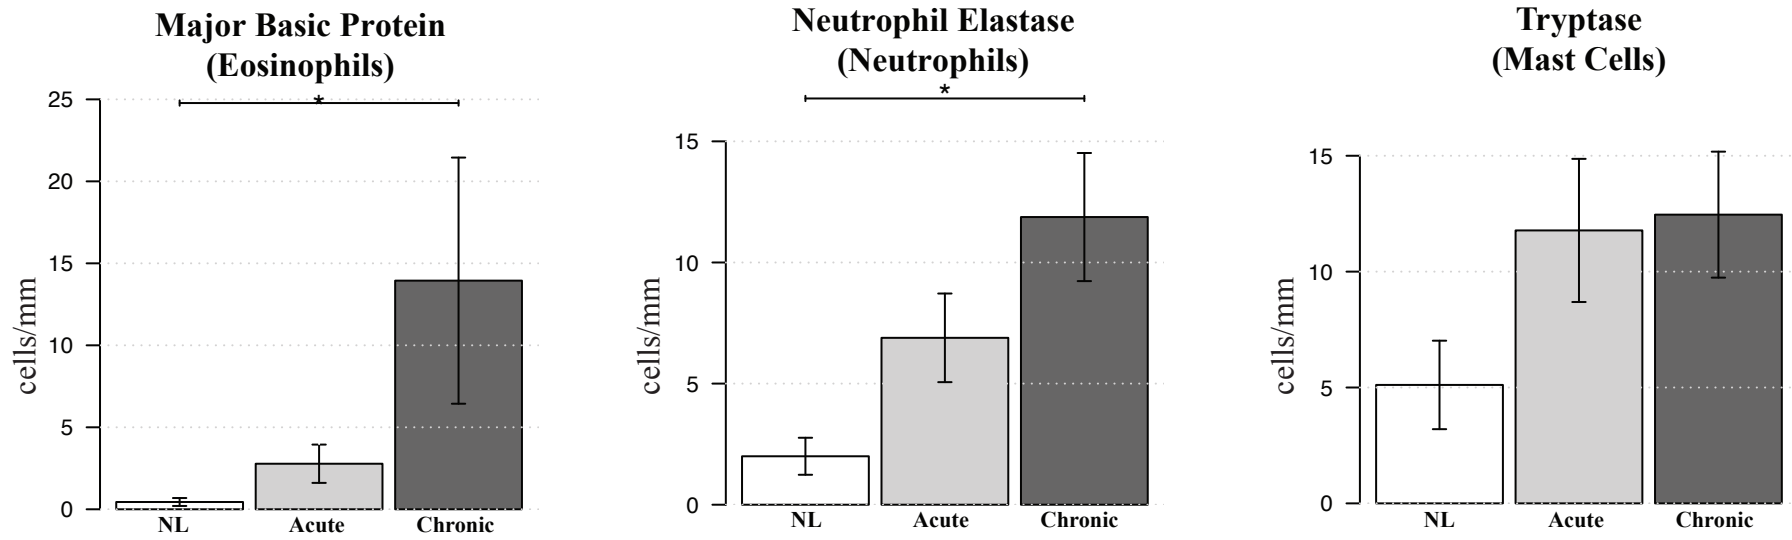

**Figure E3. Cell counts of eosinophils, neutrophils and mast cells in non-lesional (NL), acute and chronic AD skin lesions.** Cell counts of eosinophils (major basic protein+ cells) and neutrophils (neutrophil elastase+ cells) increased from non-lesional through chronic disease ( $P < 0.04$ , and  $P < 0.02$ , respectively). \* $P < .05$ , \*\* $P < .01$ , and \*\*\* $P < .001$ , ( $n = 10$ ). Bar plots represent mean  $\pm$  SEM.
