# Supplementary material
Source: PubMed Central journal article supplement (PMC3991245)
Supplement: NIHMS484572-supplement-09.pdf [file NIHMS484572-supplement-09.pdf]

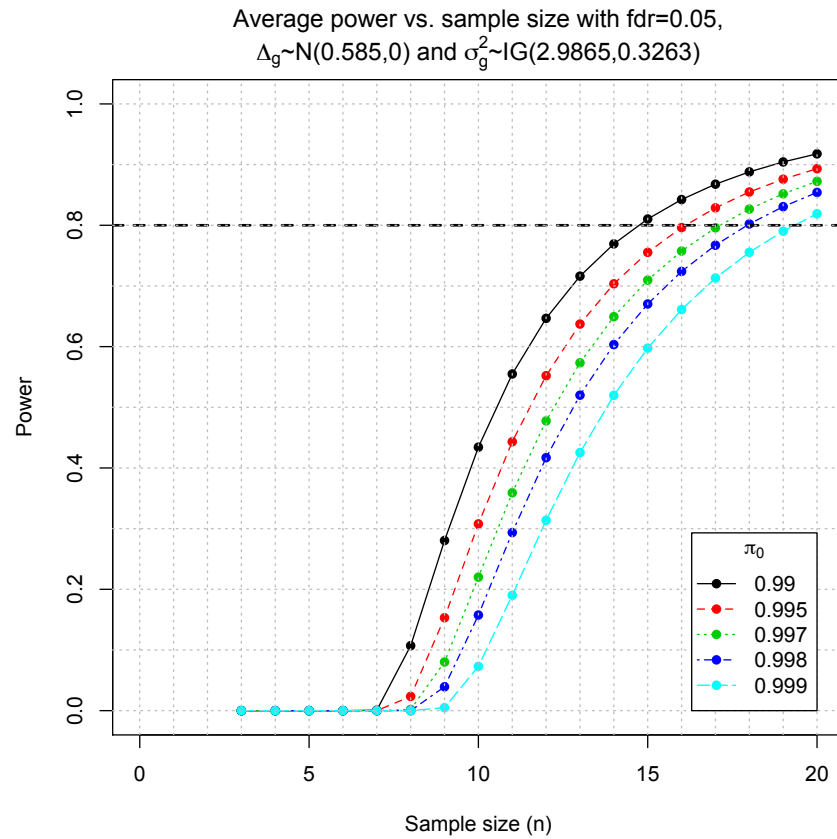

**Figure E4. Average power vs. sample size needed to detect differences of 1.5 fold change at 0.05 FDR significance level.**
